# Supplementary material for: Cell Cycle-Regulated Protein Abundance Changes in Synchronously Proliferating HeLa Cells Include Regulation of Pre-mRNA Splicing Proteins
Source: PubMed Central journal article supplement (PMC3592840; doi:10.1371/journal.pone.0058456), 2013-03-08

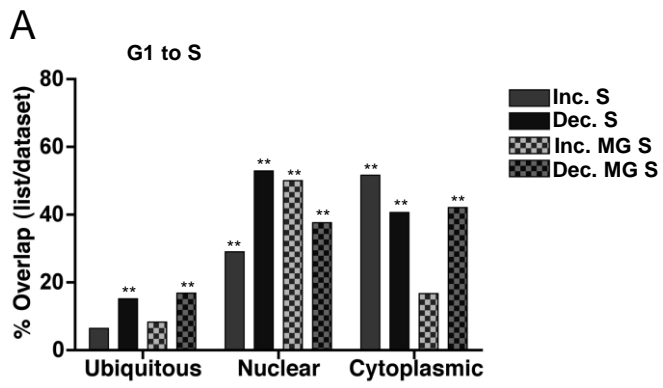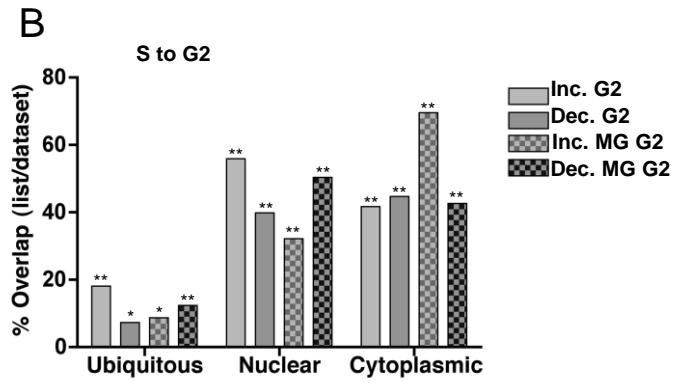

Supplement: pone.0058456.s002.pdf [file pone.0058456.s002.pdf]
